# Supplementary material for: Mechanism for the SNAr reaction of atrazine with endogenous thiols: experimental and theoretical study
Source: Royal Society of Chemistry journal article supplement (doi:10.1039/c7nj02708g), 2017-01-01
Supplement: c7nj02708g1.pdf [file c7nj02708g1.pdf]

## **ELECTRONIC SUPPLEMENTARY INFORMATION**

### **Mechanism for S<sub>N</sub>Ar reaction of atrazine and endogenous thiols: Experimental and theoretical study.**

**Karla Calfumán<sup>a\*</sup>, Sebastián Gallardo-Fuentes<sup>a</sup>, Renato Contreras<sup>a</sup>, Ricardo A. Tapia<sup>b</sup> and Paola R. Campodónico<sup>c</sup>**

<sup>a</sup>Departamento de Química, Facultad de Ciencias, Universidad de Chile, casilla 653, Santiago, Chile.

<sup>b</sup>Departamento de Orgánica, Facultad de Química, Pontificia Universidad Católica de Chile, casilla 306, Santiago 6094411, Chile.

<sup>c</sup>Centro de Química Médica, Facultad de Medicina, Clínica Alemana Universidad del Desarrollo, Código Postal 771-0162, Santiago, Chile.

## Table of contents

|                                                                                                                               | Page number |
|-------------------------------------------------------------------------------------------------------------------------------|-------------|
| Table S1. Kinetic data for the reaction of ATZ with CEE in aqueous solution at pH=6.30.....                                   | S3          |
| Table S2. Kinetic data for the reaction of ATZ with CEE in aqueous solution at pH=6.60.....                                   | S3          |
| Table S3. Kinetic data for the reaction of ATZ with CEE in aqueous solution at pH=6.90.....                                   | S3          |
| Table S4. Kinetic data for the reaction of ATZ with CYS in aqueous solution at pH=8.07.....                                   | S4          |
| Table S5. Kinetic data for the reaction of ATZ with CYS in aqueous solution at pH=8.37.....                                   | S4          |
| Table S6. Kinetic data for the reaction of ATZ with CYS in aqueous solution at pH=8.67.....                                   | S4          |
| Table S7. Kinetic data for the reaction of ATZ with GSH in aqueous solution at pH=8.45.....                                   | S5          |
| Table S8. Kinetic data for the reaction of ATZ with GSH in aqueous solution at pH=8.75.....                                   | S5          |
| Table S9. Kinetic data for the reaction of ATZ with GSH in aqueous solution at pH=9.05.....                                   | S5          |
| Table S10. Kinetic data for the reaction of ATZ with NAC in aqueous solution at pH=9.22.....                                  | S6          |
| Table S11. Kinetic data for the reaction of ATZ with NAC in aqueous solution at pH=9.52.....                                  | S6          |
| Table S12. Kinetic data for the reaction of ATZ with NAC in aqueous solution at pH=9.82.....                                  | S6          |
| Table S13. Cartesian coordinates of TS-1a.....                                                                                | S7          |
| Table S14. Cartesian coordinates of TS-1b.....                                                                                | S8          |
| Table S15. Cartesian coordinates of TS-1c.....                                                                                | S9          |
| Figure S1. MS of ATZ and its corresponding fragmentation pattern.....                                                         | S10         |
| Figure S2. MS of CEE and its corresponding fragmentation pattern.....                                                         | S11         |
| Table S16. Kinetic data for the reaction of ATZ with CEE in aqueous solution at pH=9.06.....                                  | S12         |
| Table S17. Kinetic data for the reaction of ATZ with CEE in aqueous solution at pH=9.36.....                                  | S12         |
| Table S18. Kinetic data for the reaction of ATZ with CEE in aqueous solution at pH=9.66.....                                  | S12         |
| Figure S3: Plot of $k_{obs}$ vs. free CEE concentration in water.....                                                         | S13         |
| Figure S4. Brönsted type plot.....                                                                                            | S14         |
| Table S19. $\Delta G^\ddagger$ values for the reactions between ATZ and biothiol series carried out in aqueous media<br>..... | S15         |

Table S1. Kinetic data for the reaction of ATZ with CEE in aqueous solution at 25°C±0.1°C and pH=6.3

|   | [CEE] <sub>F</sub> | <i>k</i> <sub>obs</sub> / s <sup>-1</sup> |
|---|--------------------|-------------------------------------------|
| 1 | 0.0035             | 1.8*10 <sup>-6</sup>                      |
| 2 | 0.0040             | 2.5*10 <sup>-6</sup>                      |
| 3 | 0.0050             | 5.0*10 <sup>-6</sup>                      |
| 4 | 0.0060             | 6.4*10 <sup>-6</sup>                      |
| 5 | 0.0071             | 7.3*10 <sup>-6</sup>                      |
| 6 | 0.0080             | 8.7*10 <sup>-6</sup>                      |
| 7 | 0.0090             | 9.5*10 <sup>-6</sup>                      |

Table S2. Kinetic data for the reaction of ATZ with CEE in aqueous solution at 25°C±0.1°C and pH=6.6

|   | [CEE] <sub>F</sub> | <i>k</i> <sub>obs</sub> / s <sup>-1</sup> |
|---|--------------------|-------------------------------------------|
| 1 | 0.0035             | 3.5*10 <sup>-6</sup>                      |
| 2 | 0.0045             | 5.5*10 <sup>-6</sup>                      |
| 3 | 0.0051             | 6.6*10 <sup>-6</sup>                      |
| 4 | 0.0060             | 8.2*10 <sup>-6</sup>                      |
| 5 | 0.0070             | 9.1*10 <sup>-6</sup>                      |
| 6 | 0.0081             | 1.1*10 <sup>-5</sup>                      |
| 7 | 0.0090             | 1.3*10 <sup>-5</sup>                      |

Table S3. Kinetic data for the reaction of ATZ with CEE in aqueous solution at 25°C±0.1°C and pH=6.9

|   | [CEE] <sub>F</sub> | <i>k</i> <sub>obs</sub> / s <sup>-1</sup> |
|---|--------------------|-------------------------------------------|
| 1 | 0.0035             | 5.8*10 <sup>-6</sup>                      |
| 2 | 0.0040             | 7.1*10 <sup>-6</sup>                      |
| 3 | 0.0050             | 8.9*10 <sup>-6</sup>                      |
| 4 | 0.0060             | 1.1*10 <sup>-5</sup>                      |
| 5 | 0.0070             | 1.5*10 <sup>-5</sup>                      |
| 6 | 0.0080             | 1.7*10 <sup>-5</sup>                      |
| 7 | 0.0090             | 1.8*10 <sup>-5</sup>                      |

Table S4. Kinetic data for the reaction of ATZ with CYS in aqueous solution at 25°C±0.1°C and pH=8.07

|   | [CYS] <sub>F</sub> | <i>k</i> <sub>obs</sub> / s <sup>-1</sup> |
|---|--------------------|-------------------------------------------|
| 1 | 0.0035             | 2.1*10 <sup>-6</sup>                      |
| 2 | 0.0040             | 4.1*10 <sup>-6</sup>                      |
| 3 | 0.0050             | 5.7*10 <sup>-6</sup>                      |
| 4 | 0.0060             | 8.3*10 <sup>-6</sup>                      |
| 5 | 0.0071             | 1.3*10 <sup>-5</sup>                      |
| 6 | 0.0080             | 1.6*10 <sup>-5</sup>                      |
| 7 | 0.0090             | 1.8*10 <sup>-5</sup>                      |

Table S5. Kinetic data for the reaction of ATZ with CYS in aqueous solution at 25°C±0.1°C and pH=8.37

|   | [CYS] <sub>F</sub> | <i>k</i> <sub>obs</sub> / s <sup>-1</sup> |
|---|--------------------|-------------------------------------------|
| 1 | 0.0035             | 2.5*10 <sup>-6</sup>                      |
| 2 | 0.0045             | 4.3*10 <sup>-6</sup>                      |
| 3 | 0.0051             | 4.8*10 <sup>-6</sup>                      |
| 4 | 0.0060             | 5.5*10 <sup>-6</sup>                      |
| 5 | 0.0070             | 7.0*10 <sup>-5</sup>                      |
| 6 | 0.0081             | 8.2*10 <sup>-5</sup>                      |
| 7 | 0.0090             | 9.4*10 <sup>-5</sup>                      |

Table S6. Kinetic data for the reaction of ATZ with CYS in aqueous solution at 25°C±0.1°C and pH=8.67

|   | [CYS] <sub>F</sub> | <i>k</i> <sub>obs</sub> / s <sup>-1</sup> |
|---|--------------------|-------------------------------------------|
| 1 | 0.0035             | 6.7*10 <sup>-6</sup>                      |
| 2 | 0.0040             | 8.1*10 <sup>-6</sup>                      |
| 3 | 0.0050             | 9.0*10 <sup>-6</sup>                      |
| 4 | 0.0060             | 1.0*10 <sup>-5</sup>                      |
| 5 | 0.0070             | 1.2*10 <sup>-5</sup>                      |
| 6 | 0.0080             | 1.3*10 <sup>-5</sup>                      |
| 7 | 0.0090             | 1.5*10 <sup>-5</sup>                      |

Table S7. Kinetic data for the reaction of ATZ with GSH in aqueous solution at 25°C±0.1°C and pH=8.45

|   | [GSH] <sub>F</sub> | $k_{\text{obs}} / \text{s}^{-1}$ |
|---|--------------------|----------------------------------|
| 1 | 0.0034             | $5.2 \times 10^{-6}$             |
| 2 | 0.0040             | $7.3 \times 10^{-6}$             |
| 3 | 0.0051             | $9.1 \times 10^{-6}$             |
| 4 | 0.0061             | $1.2 \times 10^{-5}$             |
| 5 | 0.0071             | $1.5 \times 10^{-5}$             |
| 6 | 0.0080             | $1.9 \times 10^{-5}$             |
| 7 | 0.0090             | $2.2 \times 10^{-5}$             |

Table S8. Kinetic data for the reaction of ATZ with GSH in aqueous solution at 25°C±0.1°C and pH= 8.75

|   | [GSH] <sub>F</sub> | $k_{\text{obs}} / \text{s}^{-1}$ |
|---|--------------------|----------------------------------|
| 1 | 0.0036             | $1.8 \times 10^{-6}$             |
| 2 | 0.0040             | $3.5 \times 10^{-6}$             |
| 3 | 0.0050             | $5.2 \times 10^{-6}$             |
| 4 | 0.0061             | $8.0 \times 10^{-6}$             |
| 5 | 0.0070             | $1.0 \times 10^{-5}$             |
| 6 | 0.0081             | $1.4 \times 10^{-5}$             |
| 7 | 0.0090             | $1.8 \times 10^{-5}$             |

Table S9. Kinetic data for the reaction of ATZ with GSH in aqueous solution at 25°C±0.1°C and pH=9.05

|   | [GSH] <sub>F</sub> | $k_{\text{obs}} / \text{s}^{-1}$ |
|---|--------------------|----------------------------------|
| 1 | 0.0036             | $1.7 \times 10^{-6}$             |
| 2 | 0.0040             | $4.4 \times 10^{-6}$             |
| 3 | 0.0050             | $6.5 \times 10^{-6}$             |
| 4 | 0.0061             | $1.0 \times 10^{-5}$             |
| 5 | 0.0070             | $1.2 \times 10^{-5}$             |
| 6 | 0.0080             | $1.8 \times 10^{-5}$             |
| 7 | 0.0090             | $2.0 \times 10^{-5}$             |

Table S10. Kinetic data for the reaction of ATZ with NAC in aqueous solution at 25°C±0.1°C and pH=9.22

|   | [NAC] <sub>F</sub> | <i>k</i> <sub>obs</sub> / s <sup>-1</sup> |
|---|--------------------|-------------------------------------------|
| 1 | 0.0036             | 6.0*10 <sup>-6</sup>                      |
| 2 | 0.0043             | 6.1*10 <sup>-6</sup>                      |
| 3 | 0.0049             | 7.7*10 <sup>-6</sup>                      |
| 4 | 0.0060             | 8.8*10 <sup>-6</sup>                      |
| 5 | 0.0072             | 9.7*10 <sup>-6</sup>                      |
| 6 | 0.0085             | 1.1*10 <sup>-5</sup>                      |
| 7 | 0.0092             | 1.2*10 <sup>-5</sup>                      |

Table S11. Kinetic data for the reaction of ATZ with NAC in aqueous solution at 25°C±0.1°C and pH= 9.52

|   | [NAC] <sub>F</sub> | <i>k</i> <sub>obs</sub> / s <sup>-1</sup> |
|---|--------------------|-------------------------------------------|
| 1 | 0.0036             | 5.0*10 <sup>-6</sup>                      |
| 2 | 0.0041             | 7.8*10 <sup>-6</sup>                      |
| 3 | 0.0051             | 8.9*10 <sup>-6</sup>                      |
| 4 | 0.0060             | 1.2*10 <sup>-5</sup>                      |
| 5 | 0.0071             | 1.3*10 <sup>-5</sup>                      |
| 6 | 0.0081             | 1.5*10 <sup>-5</sup>                      |
| 7 | 0.0092             | 1.9*10 <sup>-5</sup>                      |

Table S12. Kinetic data for the reaction of ATZ with NAC in aqueous solution at 25°C±0.1°C and pH=9.82

|   | [NAC] <sub>F</sub> | <i>k</i> <sub>obs</sub> / s <sup>-1</sup> |
|---|--------------------|-------------------------------------------|
| 1 | 0.0036             | 9.2*10 <sup>-6</sup>                      |
| 2 | 0.0043             | 1.4*10 <sup>-5</sup>                      |
| 3 | 0.0051             | 1.5*10 <sup>-5</sup>                      |
| 4 | 0.0060             | 1.7*10 <sup>-5</sup>                      |
| 5 | 0.0065             | 2.0*10 <sup>-5</sup>                      |
| 6 | 0.0070             | 2.5*10 <sup>-5</sup>                      |
| 7 | 0.0080             | 2.9*10 <sup>-5</sup>                      |
| 8 | 0.0090             | 3.2*10 <sup>-5</sup>                      |

**Table S13:** Cartesian coordinates TS-1a

|    |             |             |             |
|----|-------------|-------------|-------------|
| C  | 0.31176300  | 0.37253900  | -0.25890300 |
| C  | 0.10323800  | 0.53461800  | 1.99195200  |
| C  | 2.11939200  | 0.10529700  | 1.07942100  |
| N  | 1.62189500  | 0.07368300  | -0.16374900 |
| N  | 1.40729000  | 0.36330700  | 2.20165200  |
| N  | -0.49843700 | 0.62644800  | 0.78345800  |
| C  | -2.18113000 | 2.30215700  | 3.31702500  |
| H  | -2.30305000 | 3.19356500  | 3.93562900  |
| S  | -0.37829200 | 2.20450000  | 3.01331700  |
| H  | -0.02186500 | 1.77500800  | 4.24101800  |
| N  | 3.43746600  | -0.10006900 | 1.25604500  |
| N  | -0.19542500 | 0.44765300  | -1.50233500 |
| H  | 3.74662400  | -0.17446800 | 2.21613400  |
| C  | -1.59782900 | 0.65045000  | -1.83011700 |
| H  | -1.62769800 | 0.99308500  | -2.86626700 |
| H  | -1.98623600 | 1.47290700  | -1.22367400 |
| C  | 4.36774400  | -0.54061400 | 0.21809400  |
| H  | 4.09996500  | -0.00892000 | -0.69802600 |
| C  | 4.26003500  | -2.04535700 | -0.02831900 |
| H  | 4.55536800  | -2.60084400 | 0.86892900  |
| H  | 3.23616500  | -2.32793700 | -0.28911100 |
| H  | 4.91949900  | -2.34293800 | -0.84967600 |
| C  | -2.45280500 | -0.60184500 | -1.67171300 |
| H  | -2.39491700 | -0.99726300 | -0.65289700 |
| H  | -3.49968500 | -0.37036500 | -1.89117600 |
| H  | -2.12074300 | -1.38400800 | -2.36094700 |
| C  | 5.77967400  | -0.13998800 | 0.62847000  |
| H  | 6.06211500  | -0.62904000 | 1.56814700  |
| H  | 6.49311700  | -0.44971300 | -0.13993900 |
| H  | 5.86338100  | 0.94254100  | 0.76170000  |
| C  | -3.00461200 | 2.47865700  | 2.04983500  |
| H  | -2.51463300 | 3.16123500  | 1.34837700  |
| H  | -2.48987200 | 1.42399100  | 3.88770100  |
| H  | 0.43228500  | 0.16968600  | -2.24314900 |
| Cl | -0.94742800 | -0.81405200 | 3.10682800  |
| N  | -3.17977900 | 1.18797600  | 1.33791600  |
| H  | -3.59009400 | 0.47971100  | 1.95121100  |
| H  | -3.82566700 | 1.31671900  | 0.55491000  |
| C  | -4.39500500 | 3.10006700  | 2.36798700  |
| O  | -5.38542400 | 2.56353100  | 1.81530400  |
| O  | -4.38580000 | 4.10449700  | 3.11715800  |
| H  | -2.24887900 | 0.84714500  | 0.97589900  |

Energy=-1768.5160891 a.u    NIMAG=1 ;  $\nu= 334 \text{ icm}^{-1}$

**Table S14:** Cartesian coordinates TS-1b

|    |             |             |             |
|----|-------------|-------------|-------------|
| C  | -0.05651600 | 0.11345500  | 0.01479200  |
| C  | -0.04444000 | 0.06979300  | 2.24601300  |
| C  | 1.90273700  | 0.03787900  | 1.14215000  |
| N  | 1.28391900  | 0.24144000  | -0.03531200 |
| N  | 1.29035700  | -0.14317300 | 2.31818300  |
| N  | -0.77977600 | -0.08179800 | 1.11850500  |
| C  | -1.74079900 | 2.76892800  | 1.83525200  |
| H  | -2.46915500 | 3.18720600  | 2.53230200  |
| S  | -0.17930300 | 2.36787700  | 2.67500000  |
| N  | 3.26557500  | 0.05142900  | 1.16089700  |
| N  | -0.70750600 | 0.25292200  | -1.17698200 |
| H  | 3.65293000  | -0.24756700 | 2.04833200  |
| C  | -2.11681200 | -0.07701300 | -1.35116800 |
| H  | -2.45377300 | 0.43371800  | -2.25651300 |
| H  | -2.66971800 | 0.34977100  | -0.51171200 |
| C  | 4.08409400  | -0.29896600 | -0.00228100 |
| H  | 3.66556500  | 0.23090900  | -0.85978100 |
| C  | 4.04500500  | -1.80258000 | -0.27450400 |
| H  | 4.49068200  | -2.35150500 | 0.56315200  |
| H  | 3.01588900  | -2.15146900 | -0.40572000 |
| H  | 4.60697300  | -2.04566500 | -1.18206200 |
| C  | -2.37990300 | -1.57427200 | -1.46869300 |
| H  | -2.05339500 | -2.10368100 | -0.56884100 |
| H  | -3.44974500 | -1.75807500 | -1.60899700 |
| H  | -1.84691000 | -1.99370700 | -2.32818900 |
| C  | 5.50699900  | 0.19109400  | 0.23569700  |
| H  | 5.93583600  | -0.28434500 | 1.12596400  |
| H  | 6.14087900  | -0.06217300 | -0.61904800 |
| H  | 5.53520200  | 1.27544300  | 0.37772400  |
| C  | -1.57117000 | 3.76591500  | 0.67865400  |
| H  | -1.26120400 | 4.73962300  | 1.06202200  |
| H  | -2.14723200 | 1.83042400  | 1.43315600  |
| H  | -0.11569500 | 0.11481600  | -1.98606100 |
| Cl | -0.91218900 | -0.56240400 | 3.69180600  |
| N  | -0.48540200 | 3.28552200  | -0.21431000 |
| H  | 0.28981600  | 2.96030300  | 0.38788700  |
| H  | -0.81542300 | 2.49507000  | -0.78577900 |
| C  | -2.87774000 | 3.91487000  | -0.11661900 |
| O  | -2.92935300 | 3.38267500  | -1.25653600 |
| O  | -3.80328900 | 4.53962700  | 0.46408800  |
| H  | -0.15519000 | 4.01729800  | -0.84432000 |

Energy= -1768.5341418 a.u NIMAG= 1 ;  $\nu$ = 290  $\text{icm}^{-1}$



**Table S15:** Cartesian coordinates TS-1c

|    |             |             |             |
|----|-------------|-------------|-------------|
| C  | -0.35309602 | -0.72301432 | -0.20898212 |
| C  | -0.35309602 | -0.72301432 | 2.02603988  |
| C  | 1.59952098  | -0.72301432 | 0.93171088  |
| N  | 0.98830198  | -0.57119132 | -0.25385712 |
| N  | 0.98566598  | -0.89419632 | 2.10978688  |
| N  | -1.07930202 | -0.89240432 | 0.90197488  |
| C  | -2.09796202 | 1.98627368  | 1.59017188  |
| H  | -2.85432502 | 2.36955068  | 2.28110188  |
| S  | -0.55438802 | 1.61219668  | 2.47005188  |
| N  | 2.96356898  | -0.66603032 | 0.96323688  |
| N  | -0.99276402 | -0.70825932 | -1.39988612 |
| H  | 3.34648998  | -0.93619232 | 1.86188388  |
| C  | -2.43291102 | -0.78937332 | -1.57344412 |
| H  | -2.67809102 | -0.23301032 | -2.48200212 |
| H  | -2.90779902 | -0.27184532 | -0.73618712 |
| C  | 3.80119098  | -1.02845932 | -0.18296912 |
| H  | 3.37302898  | -0.53919332 | -1.05995612 |
| C  | 3.81177698  | -2.54002032 | -0.41115612 |
| H  | 4.25402998  | -3.05241532 | 0.45121688  |
| H  | 2.79687798  | -2.92323732 | -0.55551712 |
| H  | 4.40045798  | -2.79009432 | -1.29956312 |
| C  | -2.95825102 | -2.21694732 | -1.67991912 |
| H  | -2.73829102 | -2.78605332 | -0.77172912 |
| H  | -4.04351502 | -2.20792532 | -1.82375712 |
| H  | -2.50602902 | -2.73645232 | -2.53077712 |
| C  | 5.20779798  | -0.48803532 | 0.04317988  |
| H  | 5.64484998  | -0.91387532 | 0.95431988  |
| H  | 5.85226398  | -0.75681932 | -0.79858812 |
| H  | 5.20195698  | 0.60178668  | 0.13860288  |
| C  | -1.90415902 | 2.99911468  | 0.43199388  |
| H  | -1.60844902 | 3.95987968  | 0.86306688  |
| H  | -2.46406402 | 1.04137268  | 1.16321688  |
| H  | -0.40740902 | -0.65859632 | -2.22025912 |
| Cl | -1.21646802 | -1.36357732 | 3.47372088  |
| N  | -0.91444202 | 2.60220268  | -0.55934512 |
| H  | -0.10336702 | 2.28513368  | -0.02703312 |
| H  | -1.25736802 | 1.76986968  | -1.03722212 |
| C  | -3.24132302 | 3.19762368  | -0.23860312 |
| O  | -3.59115702 | 2.66171368  | -1.27738712 |
| O  | -4.05304502 | 4.00355968  | 0.45740088  |
| H  | -4.91670802 | 4.04296968  | 0.01546288  |

Energy= -1768.9717124a.u NIMAG= 1 ;  $\nu$ = 240  $\text{icm}^{-1}$

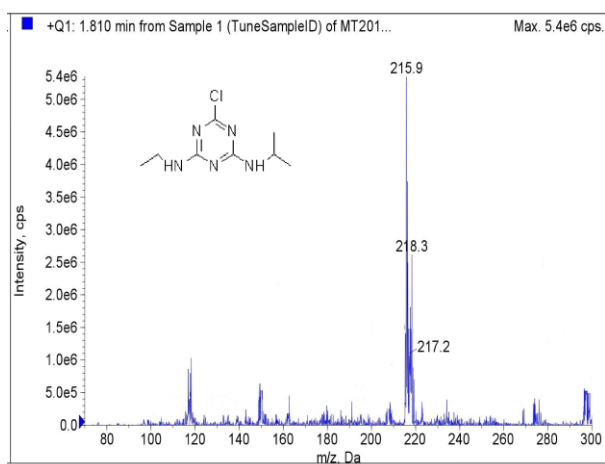

**A**

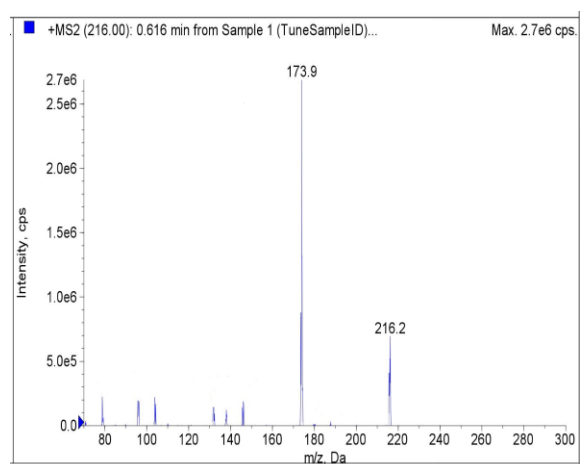

**B**

**Figure S1:** MS of ATZ (A) and its corresponding fragmentation pattern (B).

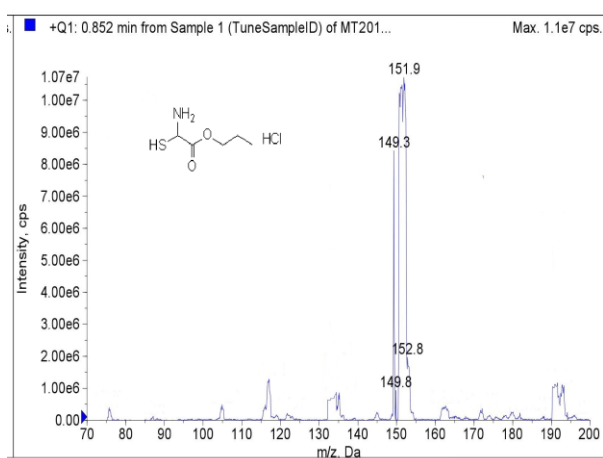

**A**

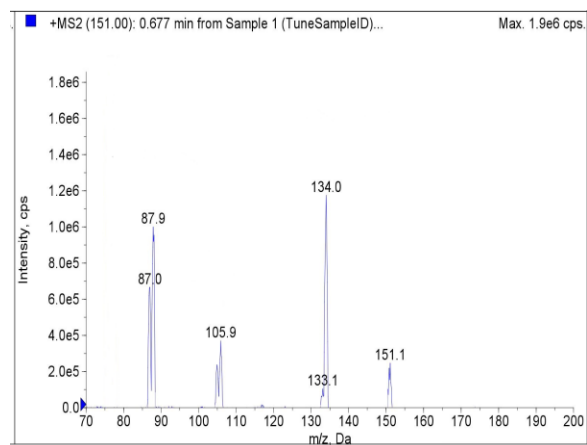

**B**

**Figure S2:** MS of CEE (A) and its corresponding fragmentation pattern (B).

Table S16. Kinetic data for the reaction of ATZ with CEE in aqueous solution at 25°C±0.1°C and pH= 9.06

|   | [CEE] <sub>F</sub> | <i>k</i> <sub>obs</sub> / s <sup>-1</sup> |
|---|--------------------|-------------------------------------------|
| 1 | 0.0036             | 1.2*10 <sup>-6</sup>                      |
| 2 | 0.0041             | 2.3*10 <sup>-6</sup>                      |
| 3 | 0.0050             | 4.7*10 <sup>-6</sup>                      |
| 4 | 0.0060             | 7.2*10 <sup>-6</sup>                      |
| 5 | 0.0070             | 1.0*10 <sup>-5</sup>                      |
| 6 | 0.0081             | 1.3*10 <sup>-5</sup>                      |
| 7 | 0.0090             | 1.5*10 <sup>-5</sup>                      |

Table S17. Kinetic data for the reaction of ATZ with CEE in aqueous solution at 25°C±0.1°C and pH=9.36

|   | [CEE] <sub>F</sub> | <i>k</i> <sub>obs</sub> / s <sup>-1</sup> |
|---|--------------------|-------------------------------------------|
| 1 | 0.0035             | 1.3*10 <sup>-6</sup>                      |
| 2 | 0.0040             | 4.2*10 <sup>-6</sup>                      |
| 3 | 0.0050             | 7.5*10 <sup>-6</sup>                      |
| 4 | 0.0061             | 1.0*10 <sup>-5</sup>                      |
| 5 | 0.0071             | 1.3*10 <sup>-5</sup>                      |
| 6 | 0.0080             | 1.6*10 <sup>-5</sup>                      |
| 7 | 0.0091             | 1.8*10 <sup>-5</sup>                      |

Table S18. Kinetic data for the reaction of ATZ with CEE in aqueous solution at 25°C±0.1°C and pH= 9.66

|   | [CEE] <sub>F</sub> | <i>k</i> <sub>obs</sub> / s <sup>-1</sup> |
|---|--------------------|-------------------------------------------|
| 1 | 0.0035             | 3.6*10 <sup>-7</sup>                      |
| 2 | 0.0040             | 5.4*10 <sup>-6</sup>                      |
| 3 | 0.0050             | 8.2*10 <sup>-6</sup>                      |
| 4 | 0.0060             | 1.3*10 <sup>-5</sup>                      |
| 5 | 0.0071             | 1.6*10 <sup>-5</sup>                      |
| 6 | 0.0080             | 2.1*10 <sup>-5</sup>                      |
| 7 | 0.0091             | 2.6*10 <sup>-5</sup>                      |

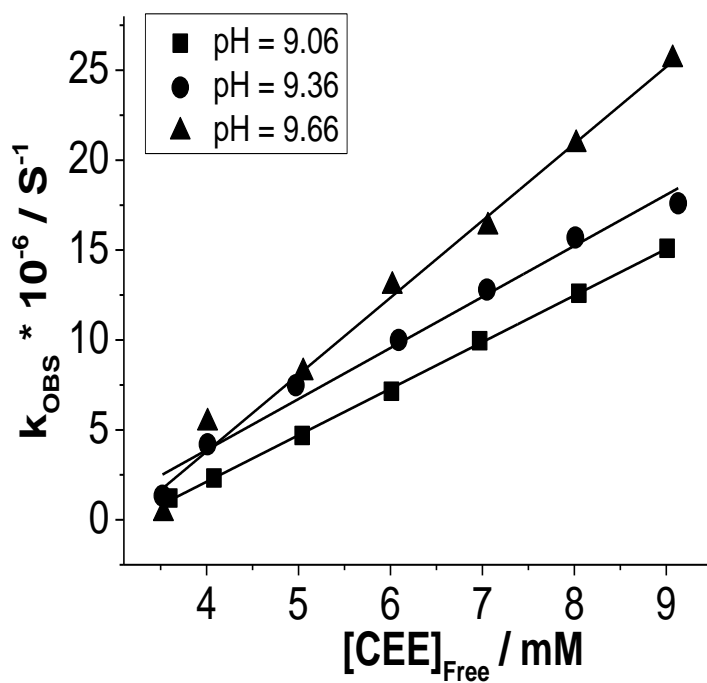

Figure S3: Plot of  $k_{obs}$  vs. free CEE concentration in water.

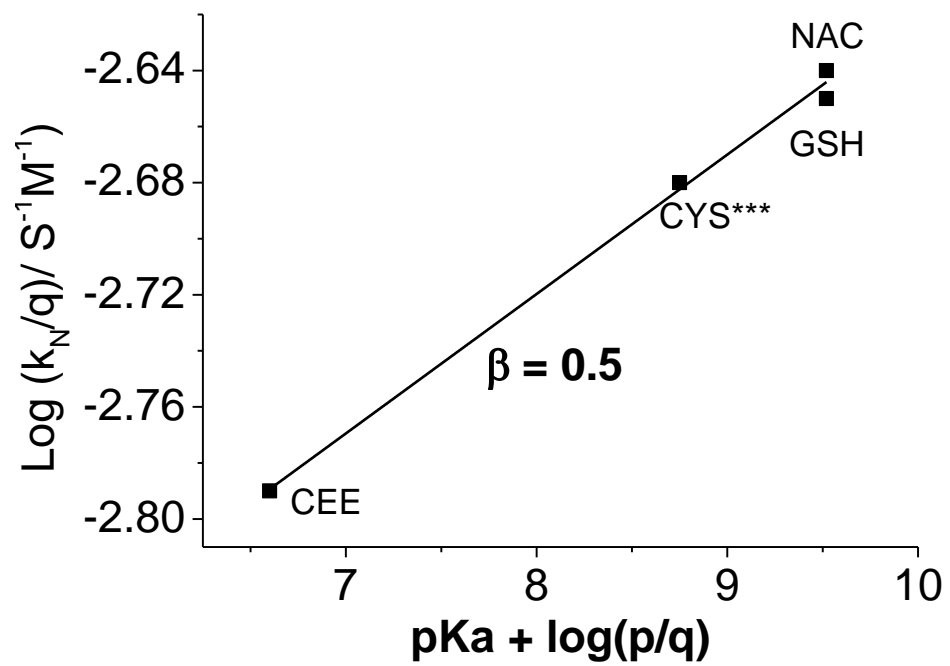

Figure S4: Brønsted type plots (CYS\*\*\* value adjusted according to its pKa).

**Table S19:**  $\Delta G^\ddagger$  values for the reactions between ATZ and biothiol series carried out in aqueous media.

| <b>Biothiols</b>            | <b>pH</b> | <b><math>^a\Delta G^\ddagger</math> Kcal/mol</b> |
|-----------------------------|-----------|--------------------------------------------------|
| <b>CYSTEINE ETHYL ESTER</b> |           |                                                  |
| pKa - 0.3                   | 6.30      | 16.3                                             |
| pKa                         | 6.60      | 15.9                                             |
| pKa + 0.3                   | 6.90      | 15.0                                             |
| <b>CYSTEINE</b>             |           |                                                  |
| pKa- 0.3                    | 8.07      | 14.4                                             |
| pKa                         | 8.37      | 16.7                                             |
| pKa + 0.3                   | 8.67      | 16.3                                             |
| <b>GLUTHATIONE</b>          |           |                                                  |
| pKa - 0.3                   | 8.45      | 14.4                                             |
| pKa                         | 8.75      | 14.5                                             |
| pKa + 0.3                   | 9.05      | 14.2                                             |
| <b>N-ACETYLCYSTEINE</b>     |           |                                                  |
| pKa - 0.3                   | 9.22      | 15.9                                             |
| pKa                         | 9.52      | 15.1                                             |
| pKa +0.3                    | 9.82      | 13.5                                             |

$^a\Delta G^\ddagger$  values were determined considered the transition-state theory (1M and 298,15K).
